# Supplementary material
Source: PubMed Central journal article supplement (PMC4629913)
Supplement: NIHMS477571-supplement-01.pdf [file NIHMS477571-supplement-01.pdf]

**Figure A1.** Representative datasets illustrating linear Arrhenius model fit to microbial datasets. Four datasets (representing four different species, in different colors) from Ratkowsky et al. (2005) are each shown. In *A* and *B* the analyses are done for the PTR of each dataset. In *C* and *D* a narrower temperature range ( $0.3- 0.7 r_{\max}$ ) is used. *A* and *C*. The best-fit line to each dataset is shown along with the growth rate data. *B* and *D*. The best-fit polynomial of degree 2 is shown fit to each dataset
