# Supplementary material
Source: PubMed Central journal article supplement (PMC4629913)

$\ln(r)$

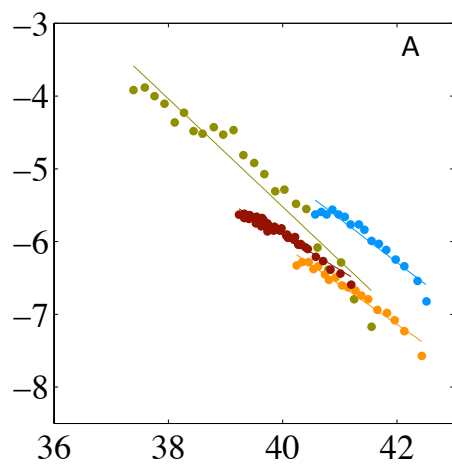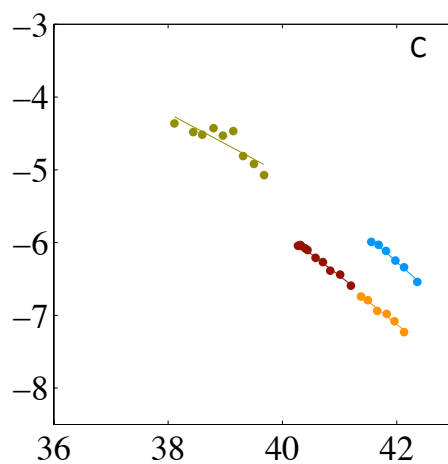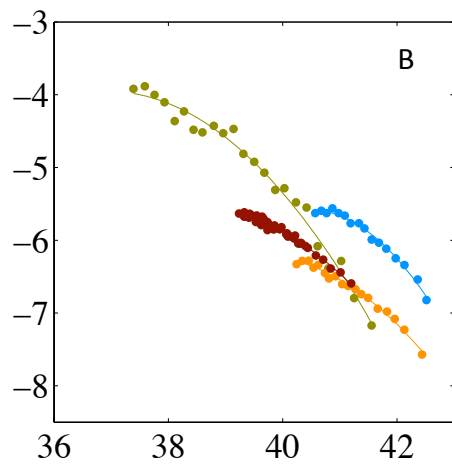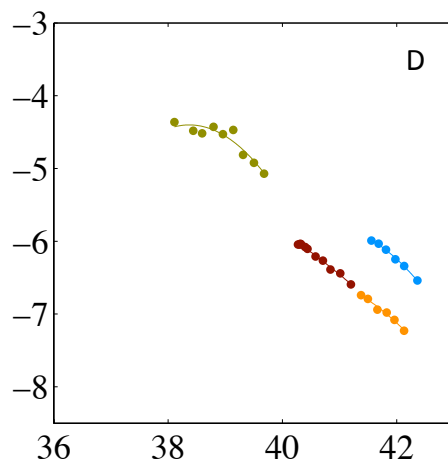

Temperature,  $1/kT$

Supplement: NIHMS477571-supplement-SupplementalFigure1.pdf [file NIHMS477571-supplement-SupplementalFigure1.pdf]
